# Supplementary material
Source: PubMed Central journal article supplement (PMC6173572)
Supplement: jiy341_suppl_supplementary_fig_1.pdf [file jiy341_suppl_supplementary_fig_1.pdf]

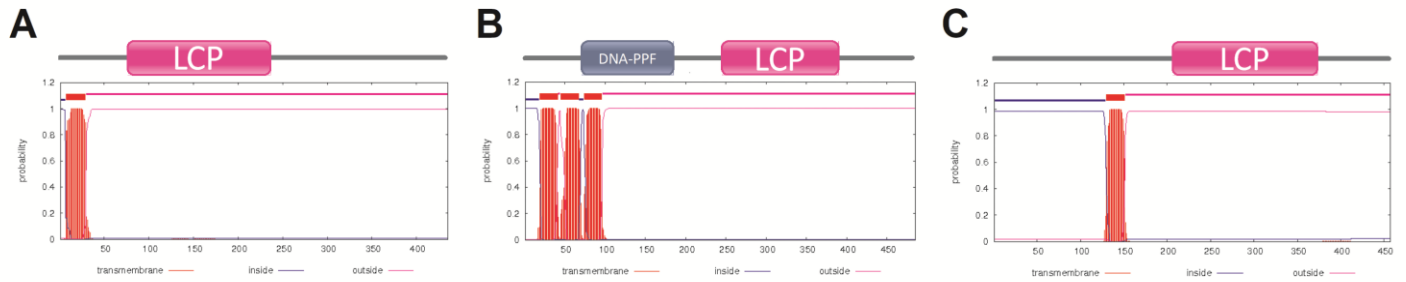

**Supplemental Figure 1. Domains and transmembrane helix predictions of GBS LCP proteins.** (A) *brpA* (W903\_0426, accession: WP\_000708159.1), (B) *cpsA* (W903\_1258, accession: WP\_000064987.1), and (C) putative *psr* (W903\_0744, WP\_000089333.1) conserved LCP domains were predicted using Pfam 31.0 (top images). Transmembrane helices were predicted using TMHMM Server v. 2.0 (bottom images).
