# Supplementary material
Source: PubMed Central journal article supplement (PMC6173572)
Supplement: jiy341_suppl_supplementary_fig_2.pdf [file jiy341_suppl_supplementary_fig_2.pdf]

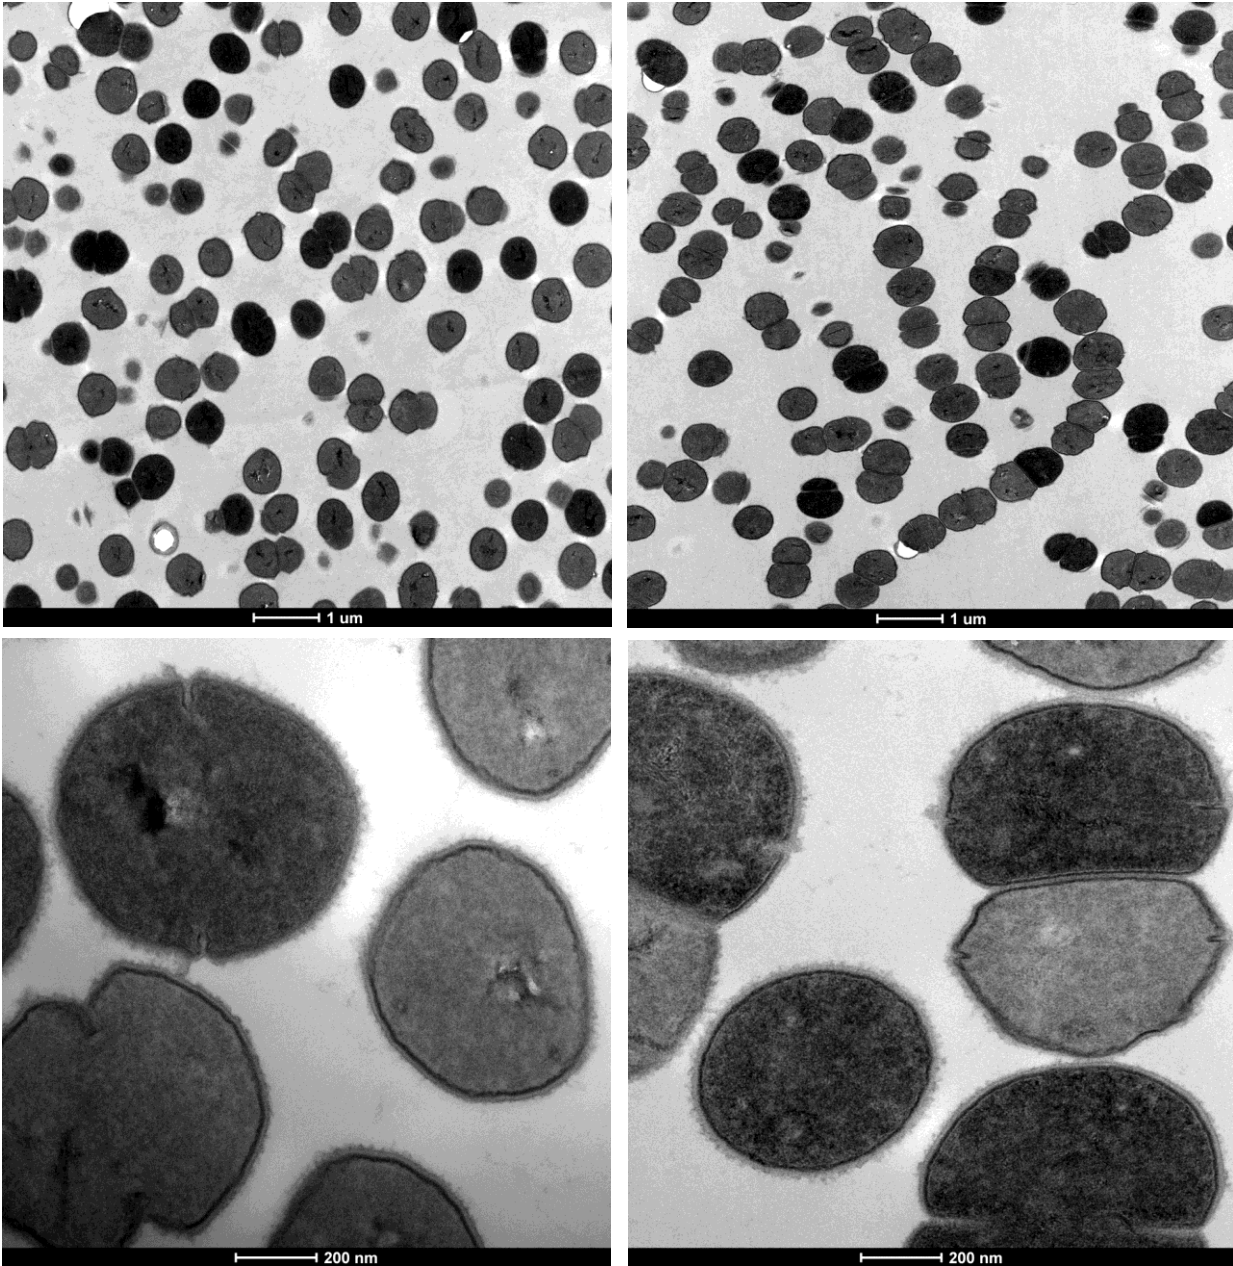

**Supplemental Figure 2. BrpA deficiency does not grossly alter cell shape, morphology, or division septa.** Representative transmission electron microscopy images of mid-logarithmic WT (left column) and  $\Delta brpA$  (right column) taken at 4,800X (top row) and 30,000X (bottom row) magnification.
