# Supplementary material
Source: PubMed Central journal article supplement (PMC6173572)
Supplement: jiy341_suppl_supplementary_fig_3.pdf [file jiy341_suppl_supplementary_fig_3.pdf]

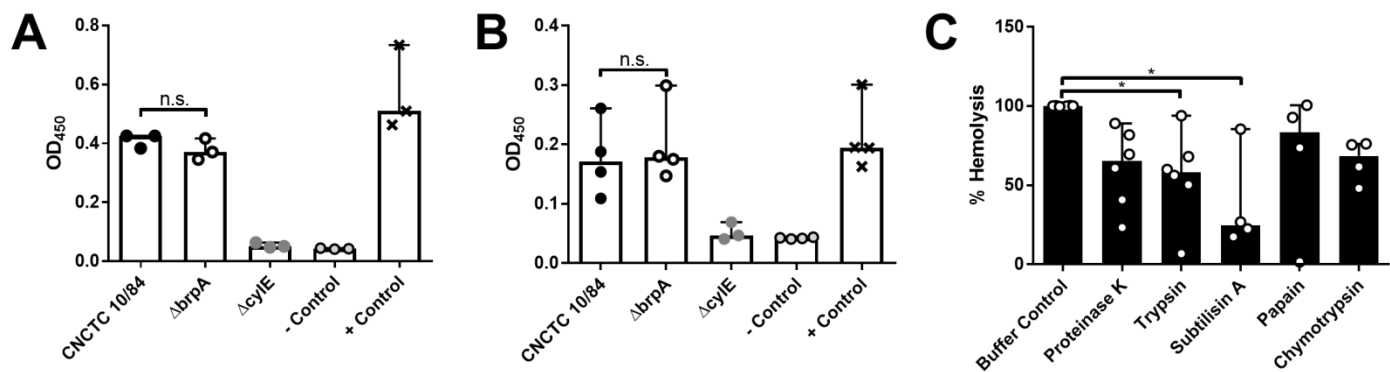

**Supplemental Figure 3. BrpA deficiency does not alter GBS hemolytic activity, however protease treatment reduces hemolysis of GBS WT extracts.** Hemolysis assays with live bacteria (A) or hemolytic extracts (B) measured spectrophotometrically (OD<sub>450</sub>) to determine hemoglobin release. A non-hemolytic mutant  $\Delta cylE$  was used as a control as well as PBS (- Control) and PBS with 1% Triton-X (+ Control). (C) Hemolytic extracts treated with proteases (1 mg/mL) prior to hemolysis assays, and normalized to untreated extracts (Buffer Control). Independent experiments are shown ( $n = 3-6$ ) and lines represent median  $\pm$  95% CI. Data was analyzed using Kruskal-Wallis with Dunn's multiple comparisons test. \* $P < 0.05$ , or n.s. is not significant.
