# Supplementary material
Source: PubMed Central journal article supplement (PMC6173572)
Supplement: jiy341_suppl_supplementary_fig_4.pdf [file jiy341_suppl_supplementary_fig_4.pdf]

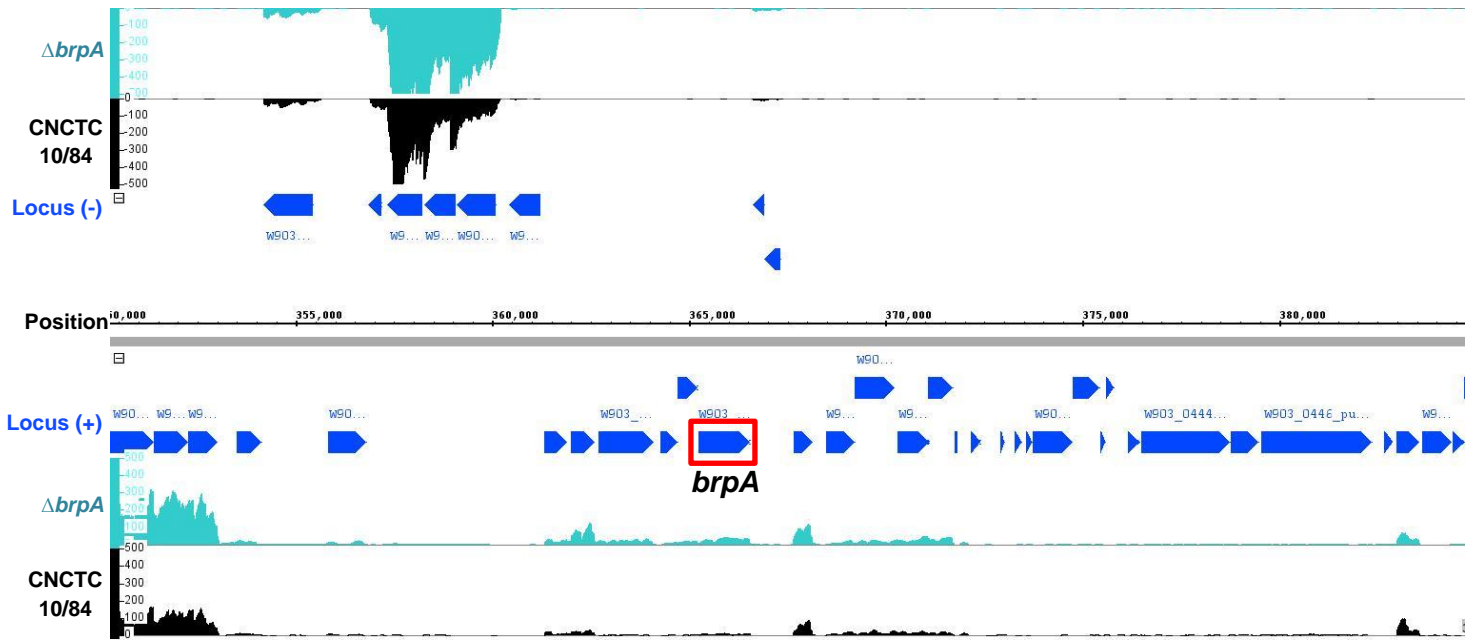

**Supplemental Figure 4. Insertional mutagenesis of *brpA* does not alter expression of downstream genes.** RNA-sequencing read alignment of late-logarithmic phase CNCTC 10/84 (black) and  $\Delta brpA$  (teal). Raw number of reads is indicated on the y-axis, and individual loci on positive and negative strands are indicated in blue. The *brpA* gene (locus W903\_0426) is boxed in red. Graphic was created using Integrated Genome Browser v. 9.0.0.
